# Supplementary material for: Systemic Metabolomic Changes in Blood Samples of Lung Cancer Patients Identified by Gas Chromatography Time-of-Flight Mass Spectrometry
Source: MDPI journal article supplement (doi:10.3390/metabo5020192), 2015-04-09
Supplement: s1 [file s1]

**Table S3.** Study 1: Misclassification rate of PLS with 1 to 10 latent components to classify Study 1 samples based on leave-one-out cross validation,  $R_2$ ,  $Q_2$  and percent of variance explained for 1 to 10 latent components.

| Number of Latent Components             | 1      | 2      | 3      | 4      | 5      | 6      | 7      | 8      | 9      | 10     |
|-----------------------------------------|--------|--------|--------|--------|--------|--------|--------|--------|--------|--------|
| <b>(A) Adjusted for sex and age</b>     |        |        |        |        |        |        |        |        |        |        |
| Misclassification Rate                  | 47.4%  | 36.8%  | 47.4%  | 47.4%  | 52.6%  | 50.0%  | 52.6%  | 52.6%  | 52.6%  | 52.6%  |
| Sensitivity                             | 55.6%  | 66.7%  | 55.6%  | 55.6%  | 55.6%  | 55.6%  | 50.0%  | 55.6%  | 50.0%  | 50.0%  |
| Specificity                             | 50.0%  | 60.0%  | 50.0%  | 50.0%  | 40.0%  | 45.0%  | 45.0%  | 40.0%  | 45.0%  | 45.0%  |
| $R_2$                                   | 64.6%  | 88.7%  | 93.8%  | 97.9%  | 99.4%  | 99.8%  | 99.9%  | 100.0  | 100.0  | 100.0  |
| $Q_2$                                   | −0.213 | −0.188 | −0.358 | −0.295 | −0.264 | −0.268 | −0.253 | −0.245 | −0.239 | −0.236 |
| % of Variance explained by components   | 5.46%  | 9.75%  | 19.6%  | 23.8%  | 27.9%  | 31.9%  | 35.2%  | 39.6%  | 44.2%  | 47.3%  |
| <b>(B) Not Adjusted for sex and age</b> |        |        |        |        |        |        |        |        |        |        |
| Misclassification Rate                  | 57.9%  | 42.1%  | 42.1%  | 39.5%  | 42.1%  | 39.5%  | 39.5%  | 39.5%  | 42.1%  | 42.1%  |
| Sensitivity                             | 33.3%  | 50.0%  | 50.0%  | 44.4%  | 50.0%  | 50.0%  | 50.0%  | 50.0%  | 50.0%  | 50.0%  |
| Specificity                             | 50.0%  | 65.0%  | 65.0%  | 75.0%  | 65.0%  | 70.0%  | 70.0%  | 70.0%  | 65.0%  | 65.0%  |
| $R_2$                                   | 0.702  | 0.867  | 0.956  | 0.986  | 0.995  | 0.999  | 1.00   | 1.00   | 1.00   | 1.00   |
| $Q_2$                                   | −0.288 | −0.143 | −0.096 | −0.077 | −0.089 | −0.087 | −0.095 | −0.099 | −0.102 | −0.102 |
| % of Variance explained by components   | 5.14%  | 13.9%  | 20.7%  | 25.3%  | 29.5%  | 32.7%  | 36.5%  | 40.4%  | 44.5%  | 47.8%  |

**Table S4.** Misclassification rate of PLS with 1 to 10 latent components to classify Study 2 samples based on leave-one-out cross validation,  $R_2$ ,  $Q_2$  and percent of variance explained for 1 to 10 latent components.

| Number of Latent Components                                        | 1      | 2      | 3      | 4      | 5      | 6      | 7      | 8      | 9      | 10     |
|--------------------------------------------------------------------|--------|--------|--------|--------|--------|--------|--------|--------|--------|--------|
| <b>(A) Metabolite intensities were adjusted for sex or age</b>     |        |        |        |        |        |        |        |        |        |        |
| Misclassification Rate                                             | 40.9%  | 31.8%  | 40.9%  | 45.4%  | 50.0%  | 54.5%  | 54.5%  | 54.5%  | 54.5%  | 54.5%  |
| Sensitivity                                                        | 54.5%  | 63.6%  | 54.5%  | 54.5%  | 54.5%  | 54.5%  | 54.5%  | 54.5%  | 54.5%  | 54.5%  |
| Specificity                                                        | 63.6%  | 72.7%  | 63.6%  | 54.5%  | 45.5%  | 36.3%  | 36.3%  | 36.3%  | 36.3%  | 36.3%  |
| $R_2$                                                              | 87.5%  | 95.9%  | 98.4%  | 99.7%  | 100.0% | 100.0% | 100.0% | 100.0% | 100.0% | 100.0% |
| $Q_2$                                                              | 0.250  | 0.604  | 0.581  | 0.583  | 0.585  | 0.586  | 0.586  | 0.587  | 0.587  | 0.587  |
| % X Variance                                                       | 7.93%  | 19.5%  | 45.1%  | 49.3%  | 53.3%  | 57.5%  | 61.5%  | 65.0%  | 68.4%  | 71.5%  |
| <b>(B) Metabolite intensities were not adjusted for sex or age</b> |        |        |        |        |        |        |        |        |        |        |
| Misclassification Rate                                             | 57.9%  | 42.1%  | 42.1%  | 39.5%  | 42.1%  | 39.5%  | 39.5%  | 39.5%  | 42.1%  | 42.1%  |
| Sensitivity                                                        | 33.3%  | 50.0%  | 50.0%  | 44.4%  | 50.0%  | 50.0%  | 50.0%  | 50.0%  | 50.0%  | 50.0%  |
| Specificity                                                        | 50.0%  | 65.0%  | 65.0%  | 75.0%  | 65.0%  | 70.0%  | 70.0%  | 70.0%  | 65.0%  | 65.0%  |
| $R_2$                                                              | 0.702  | 0.867  | 0.956  | 0.986  | 0.995  | 0.999  | 1.00   | 1.00   | 1.00   | 1.00   |
| $Q_2$                                                              | −0.288 | −0.143 | −0.096 | −0.077 | −0.089 | −0.087 | −0.095 | −0.099 | −0.102 | −0.102 |
| % X Variance                                                       | 5.14%  | 13.9%  | 20.7%  | 25.3%  | 29.5%  | 32.7%  | 36.5%  | 40.4%  | 44.5%  | 47.8%  |
